# Supplementary material for: Analysis of sulfonylurea herbicides in grain samples using molecularly imprinted polymers on the surface of magnetic carbon nanotubes by extraction coupled with HPLC
Source: Royal Society of Chemistry journal article supplement (doi:10.1039/c5ay02759d), 2015-12-21
Supplement: c5ay02759d1.pdf [file c5ay02759d1.pdf]

## Electronic Supplementary Information

Analysis of sulfonylurea herbicides in grain samples by molecularly  
imprinted polymers on the surface of magnetic carbon nanotubes

extraction coupled with HPLC

Xiaoxiao You and Ligang Chen\*

*Department of Chemistry, College of Science, Northeast Forestry University, 26*

*Hexing Road, Harbin 150040, China*

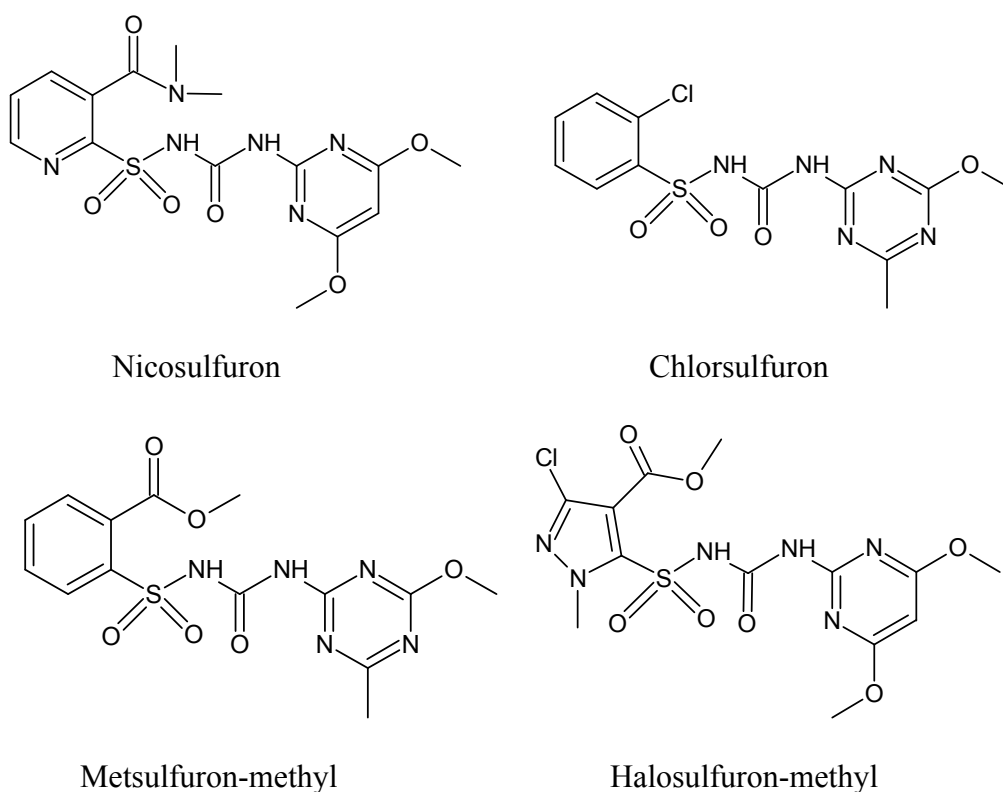

Fig. S1 Chemical structures of sulfonylurea herbicides.

---

\* Corresponding author:

Tel.: +86-451- 82190679-8244

Email: ligangchen2008@163.com (L. Chen)

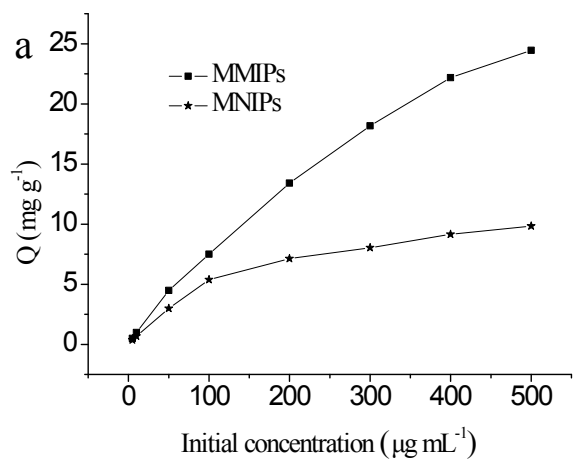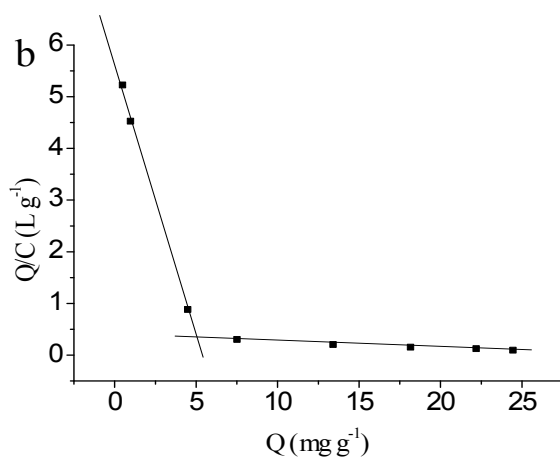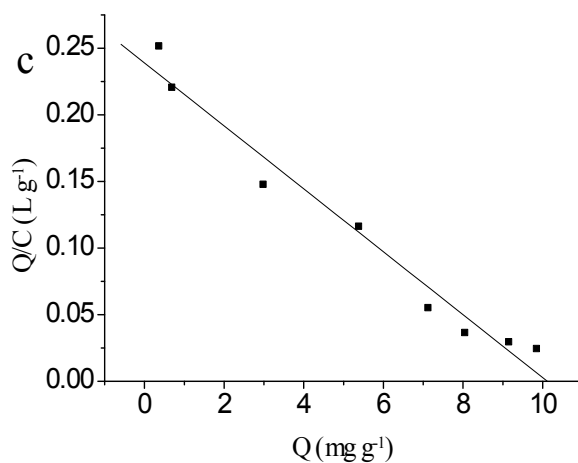

Fig. S2 Curves of (a) adsorption isotherm of MMIPs and MNIPs; Scatchard plot to estimate the binding nature of MMIPs (b) and MNIPs (c).

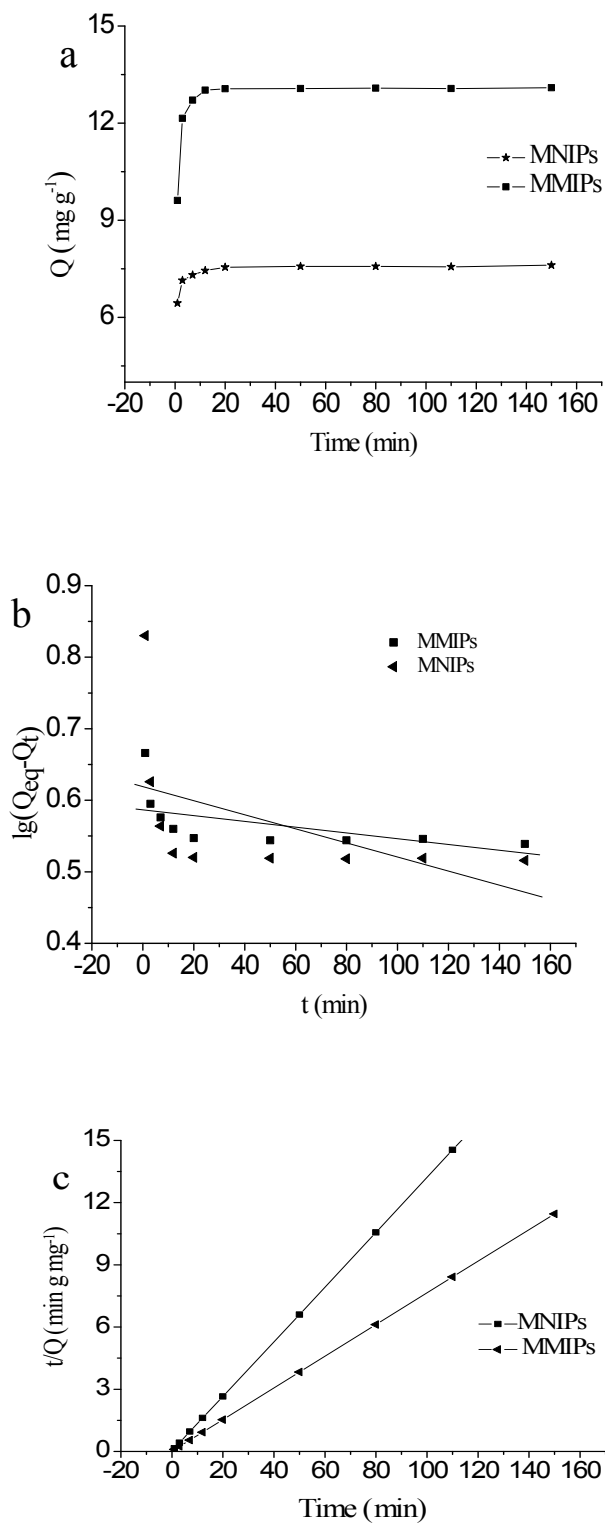

Fig. S3 Curves of adsorption varying with time (a); the first-order (b) and second-order (c) adsorption kinetics of MMIPs and MNIPs.
